# Supplementary material for: Highly efficient iron(0) nanoparticle-catalyzed hydrogenation in water in flow
Source: Royal Society of Chemistry journal article supplement (doi:10.1039/c3gc40789f), 2013-01-01

Supplementary Information for:

## Highly Efficient Iron(0) Nanoparticle-Catalyzed Hydrogenation in Water in Flow

Reuben Hudson,<sup>a,b,c</sup> Go Hamasaka,<sup>b</sup> Takao Osako,<sup>b</sup> Yochi Y. A. Yamada,<sup>c</sup> Chao-Jun Li,<sup>a</sup>  
Yasuhiro Uozumi<sup>\*b,c</sup> and Audrey Moores<sup>\*a</sup>

<sup>a</sup>Center for Green Chemistry and Catalysis, Department of Chemistry, McGill University, 801 Sherbrooke St. West, Montreal, QC,  
H3A 0B8, Canada

<sup>b</sup>Division of Complex Catalysis, Institute for Molecular Science, Okazaki, 444-8787, Japan

<sup>c</sup>Green Nanocatalysis Research Team, RIKEN, 2-1 Hirowasa, Wako, 351-0198, Japan

Proposed mechanism for olefin hydrogenation catalyzed by iron nanoparticles:

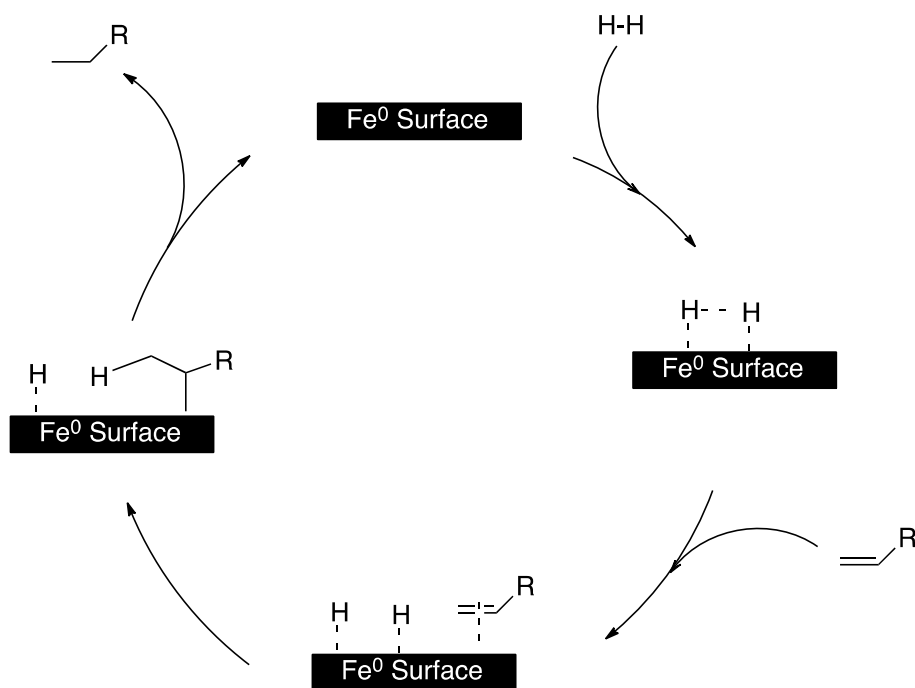

Supplement: c3gc40789f.pdf [file c3gc40789f.pdf]
